# Supplementary material for: Label-free quantitative 1H NMR spectroscopy to study low-affinity ligand–protein interactions in solution: A contribution to the mechanism of polyphenol-mediated astringency
Source: PubMed Central journal article supplement (PMC5590944; doi:10.1371/journal.pone.0184487), 2017-09-08
Supplement: pone.0184487.s001.pdf [file pone.0184487.s001.pdf]

## Supporting Information (S1 Table)

Data points behind means (Fig 3).

### Label-free quantitative $^1\text{H}$ NMR spectroscopy to study low-affinity ligand–protein interactions in solution: A contribution to the mechanism of polyphenol-mediated astringency

*Judith Delius, Oliver Frank, and Thomas Hofmann\**

\*E-mail: thomas.hofmann@tum.de

| EC                          | 7.07 ppm                 | 7.00 ppm | 6.15 ppm | 6.11 ppm |
|-----------------------------|--------------------------|----------|----------|----------|
| mucin [ $\mu\text{mol/L}$ ] | EC [ $\mu\text{mol/L}$ ] |          |          |          |
| 0                           | 2.50                     | 2.51     | 2.52     | 2.54     |
| 0.175                       | 2.31                     | 2.41     | 2.34     | 2.35     |
| 0.250                       | 2.28                     | 2.36     | 2.22     | 2.17     |
| 0.625                       | 2.00                     | 2.09     | 1.64     | 1.66     |
| 0.875                       | 1.90                     | 1.96     | 1.38     | 1.40     |
| 1.250                       | 1.76                     | 1.86     | 1.24     | 1.25     |
| 1.875                       | 1.46                     | 1.49     | 0.84     | 0.86     |
| 2.500                       | 1.30                     | 1.32     | 0.71     | 0.74     |

| ECG                         | 7.03 ppm                  | 6.90 ppm | 6.19 ppm |
|-----------------------------|---------------------------|----------|----------|
| mucin [ $\mu\text{mol/L}$ ] | ECG [ $\mu\text{mol/L}$ ] |          |          |
| 0                           | 2.53                      | 2.55     | 2.50     |
| 0.063                       | 2.32                      | 2.22     | 2.21     |
| 0.125                       | 2.07                      | 2.14     | 1.78     |
| 0.150                       | 1.77                      | 1.86     | 1.56     |
| 0.188                       | 1.59                      | 1.70     | 1.37     |
| 0.250                       | 1.33                      | 1.47     | 1.13     |
| 0.375                       | 0.91                      | 1.06     | 0.77     |
| 0.500                       | 0.75                      | 0.89     | 0.58     |
| 1.000                       | 0.33                      | 0.39     | 0.29     |
| 1.250                       | 0.27                      | 0.36     | 0.22     |

| EGC                         | 6.69 ppm                  | 6.18 ppm | 6.14 ppm |
|-----------------------------|---------------------------|----------|----------|
| mucin [ $\mu\text{mol/L}$ ] | EGC [ $\mu\text{mol/L}$ ] |          |          |
| 0                           | 2.50                      | 2.50     | 2.50     |
| 0.375                       | 2.52                      | 2.32     | 2.32     |
| 1.250                       | 2.03                      | 1.16     | 1.24     |
| 1.875                       | 1.34                      | 0.74     | 0.78     |
| 2.500                       | 1.05                      | 0.58     | 0.62     |

| EGCG                        | 7.04 ppm                   | 6.66 ppm | 6.20 ppm |
|-----------------------------|----------------------------|----------|----------|
| mucin [ $\mu\text{mol/L}$ ] | EGCG [ $\mu\text{mol/L}$ ] |          |          |
| 0                           | 2.49                       | 2.50     | 2.50     |
| 0.125                       | 1.94                       | 1.97     | 1.65     |
| 0.188                       | 1.51                       | 1.61     | 1.24     |
| 0.250                       | 1.18                       | 1.32     | 0.94     |
| 0.375                       | 0.78                       | 0.98     | 0.69     |
| 0.500                       | 0.57                       | 0.78     | 0.52     |
| 0.625                       | 0.52                       | 0.65     | 0.42     |
| 0.750                       | 0.44                       | 0.57     | 0.36     |
| 0.875                       | 0.37                       | 0.48     | 0.28     |
| 1.000                       | 0.32                       | 0.43     | 0.26     |
| 1.250                       | 0.19                       | 0.3      | 0.17     |

| methyl gallate              | measurement 1                        | measurement 2 |
|-----------------------------|--------------------------------------|---------------|
|                             | 7.17 ppm                             |               |
| mucin [ $\mu\text{mol/L}$ ] | methyl gallate [ $\mu\text{mol/L}$ ] |               |
| 0                           | 2.50                                 | 2.50          |
| 0.125                       | 2.18                                 | -             |
| 0.375                       | 2.06                                 | -             |
| 0.625                       | 1.99                                 | 1.94          |
| 0.875                       | 1.84                                 | -             |
| 1.250                       | 1.72                                 | 1.77          |
| 1.875                       | 1.53                                 | -             |
| 2.500                       | 1.40                                 | 1.44          |

| rutin                       | 7.43 ppm                    | 6.88 ppm | 6.16 ppm |
|-----------------------------|-----------------------------|----------|----------|
| mucin [ $\mu\text{mol/L}$ ] | rutin [ $\mu\text{mol/L}$ ] |          |          |
| 0                           | 2.50                        | 2.50     | 2.51     |
| 1.000                       | 2.23                        | 2.49     | 2.12     |
| 2.500                       | 1.60                        | 2.25     | 1.38     |
| 5.000                       | 1.00                        | 1.77     | 0.68     |
