# Supplementary material for: Label-free quantitative 1H NMR spectroscopy to study low-affinity ligand–protein interactions in solution: A contribution to the mechanism of polyphenol-mediated astringency
Source: PubMed Central journal article supplement (PMC5590944; doi:10.1371/journal.pone.0184487), 2017-09-08
Supplement: pone.0184487.s002.pdf [file pone.0184487.s002.pdf]

## Supporting Information (S2 Table)

Data points behind means (Fig 4).

### Label-free quantitative <sup>1</sup>H NMR spectroscopy to study low-affinity ligand–protein interactions in solution: A contribution to the mechanism of polyphenol-mediated astringency

*Judith Delius, Oliver Frank, and Thomas Hofmann\**

\*E-mail: thomas.hofmann@tum.de

| EC     | 7.07 ppm    | 7.00 ppm | 6.15 ppm | 6.11 ppm |
|--------|-------------|----------|----------|----------|
| saliva | EC [μmol/L] |          |          |          |
| 1      | 2.37        | 2.40     | 2.37     | 2.22     |
| 2      | 2.04        | 2.07     | 1.64     | 1.65     |

| ECG    | 7.03 ppm     | 6.90 ppm | 6.19 ppm |
|--------|--------------|----------|----------|
| saliva | ECG [μmol/L] |          |          |
| 1      | 0.00         | 0.00     | 0.00     |
| 2      | 0.00         | 0.00     | 0.00     |

| EGC    | 6.69 ppm     | 6.18 ppm | 6.14 ppm |
|--------|--------------|----------|----------|
| saliva | EGC [μmol/L] |          |          |
| 1      | 2.16         | 2.10     | 2.00     |
| 2      | 1.95         | 1.50     | 1.48     |

| EGCG   | 7.04 ppm      | 6.66 ppm | 6.20 ppm |
|--------|---------------|----------|----------|
| saliva | EGCG [μmol/L] |          |          |
| 1      | 0.00          | 0.00     | 0.00     |
| 2      | 0.00          | 0.00     | 0.00     |

|                |                                      |
|----------------|--------------------------------------|
| methyl gallate | 7.17 ppm                             |
| saliva         | methyl gallate [ $\mu\text{mol/L}$ ] |
| 1              | 2.42                                 |
| 2              | 2.32                                 |

|        |                             |          |          |
|--------|-----------------------------|----------|----------|
| rutin  | 7.43 ppm                    | 6.88 ppm | 6.16 ppm |
| saliva | rutin [ $\mu\text{mol/L}$ ] |          |          |
| 1      | 2.12                        | 2.39     | 2.39     |
| 2      | 2.35                        | 2.49     | 2.40     |
