# Supplementary material for: Label-free quantitative 1H NMR spectroscopy to study low-affinity ligand–protein interactions in solution: A contribution to the mechanism of polyphenol-mediated astringency
Source: PubMed Central journal article supplement (PMC5590944; doi:10.1371/journal.pone.0184487), 2017-09-08
Supplement: pone.0184487.s003.pdf [file pone.0184487.s003.pdf]

## Supporting Information (S3 Table)

Data points behind means (Fig 5).

### Label-free quantitative $^1\text{H}$ NMR spectroscopy to study low-affinity ligand–protein interactions in solution: A contribution to the mechanism of polyphenol-mediated astringency

*Judith Delius, Oliver Frank, and Thomas Hofmann\**

\*E-mail: thomas.hofmann@tum.de (TH)

| EGCG in            | 7.04 ppm                   | 6.66 ppm | 6.20 ppm |
|--------------------|----------------------------|----------|----------|
|                    | EGCG [ $\mu\text{mol/L}$ ] |          |          |
| buffer             | 2.49                       | 2.5      | 2.51     |
| saliva (10%)       | 0.81                       | 0.93     | 0.38     |
| CMC                | 2.47                       | 2.48     | 2.50     |
| saliva (10%) + CMC | 0.74                       | 0.83     | 0.44     |
